# Supplementary material for: Interprofessional online learning for primary healthcare: findings from a scoping review
Source: PubMed Central journal article supplement — BMJ Open. 2017 Aug 4;7(8):e016872. doi: 10.1136/bmjopen-2017-016872 (PMC5623444; doi:10.1136/bmjopen-2017-016872), 2017-08-04
Supplement: bmjopen-2017-016872supp001.pdf [file bmjopen-2017-016872supp001.pdf]

## Appendix 1

### List of references for included studies

- Barber C, Frank T, Walsh, K, Burton, C, Bradshaw, L, Fishwick, D, Knowledge and Utilisation of occupational asthma guidelines in primary care. *Primary Care Respiratory Journal* 2010; 19(3):274-280
- Bekkers, MJ, Simpson, S, Dunstan, F, Hood, K, Hare, M, Evans, J, Butler, C, Enhancing the quality of antibiotic prescribing in Primary Care: Qualitative evaluation of a blended learning intervention. *BMC Family Practice* 2010; 11(34): 1-11
- Buriak, S, Potter, J, Kathryn Bleckley, M, Using a Predictive Model of Clinician Intention to Improve Continuing Health Professional Education on Cancer Survivorship. *Journal of Continuing Education in the Health Professions* 2015; 35(1): 57-64
- Cuggia, M, Herry, N, Rossille, D, Lepage, E, Edan, G, A model for a Regional Health Information Network sharing clinical information between professionals in Brittany. *Studies in Health Technology and Information* 2006; 124:449-454.
- Degryse, J, De Lepeleire, J, Southgate, L, Vernooij-Dassen, M, Gay, B, Heyrman, J, An evaluation of a computer based education program for the diagnosis and management of dementia in primary care. An international study of the transcultural adaptations necessary for European dissemination. *Medical Teacher* 2009; 31: 397-402
- Docherty, A, Sandhu, H, Student-perceived barriers and facilitators to e-learning in continuing professional development in primary care. *Education for Primary Care* 2006; 17: 343-353
- Fox, N, O'Rourke, A, Roberts, C, Walker, J, Change management in primary care: design and evaluation of an internet-delivered course. *Medical Education* 2001; 35: 803-805
- Gensichen, J, Christian Vollmar, H, Sonnichsen, A, Waldmann, UM, Sandars, J, E-learning for education in primary healthcare – turning the hype into reality. *European Journal of General Practice* 2009; 15: 11-14
- Halabisky, B, Humbert, J, Stodel, E, Macdonald, C, Chambers, L, Doucette, S, Dalziel, W, Conklin, J, eLearning, Knowledge Brokering, and Nursing, Strengthening Collaborative Practice in Long-term Care. *Computers, Informatics, Nursing* 2010; 28(5): 264-273
- Hannon, K, Peters, S, Fisher, L, Riste, L, Wearden, A, Lovell, K, Turner, P, Leech, Y, Chew-Graham, C, Developing resources to support the diagnosis and management of Chronic Fatigue Syndrome/Myalgic Encephalitis (CFS/ME) in primary care: a qualitative study. *BMC Family Practice* 2012; 13(3): 1-12
- James, J, Atkins, H, Sturgess, I, Malik, R, Rayman, G, Morton, A, Hillson, R, Gregory, R, The safe use of insulin e-learning module: successful roll out of a teaching programme for all working in diabetes. *Practical Diabetes*, 2011; 28(5): 209-211
- Jenkins, MS, Geinor Bean, W, Luke, K, Part-time e-learning interprofessional pain management education for the primary and community care setting. *British Journal of Pain* 2014, 8(1): 16-26
- Kang, H, Yip, B, Chau, W, Nophal de la Rosa, A, Hall, D, Barrios, R, Montaner, J, Guillemi, S, Continuing professional development in HIV chronic disease management for primary care providers. *Medical Teacher* 2015; 37: 714-717
- MacFarlane, S, Cuevas, L, Moody, J, Russell, W, Schlecht, B, (Epidemiology training for primary health care: the use of computer assisted distance learning. *Journal of the Royal Society for Health* 2000; 116(5): 317-321

Maloney, S, Tunnecliff, J, Morgan, P, Gaida, JE, Clearihan, L, Sadasivan, S, Davies, D, Ganesh, S, Mohanty, P, Weiner, J, Reynolds, J, Ilic, D, Translating Evidence into Practice via Social Media: A Mixed-Methods Study. *Journal of Medical Internet Research* 2015; 17(10): 242-255

Marsh-Tootle, W, McGwin, G, Kohler, C, Kristofco, R, Datla, R, Wall, T, Efficacy of a Web-Based Intervention to Improve and Sustain Knowledge and Screening for Amblyopia in Primary Care Settings. *Investigative Ophthalmology and Visual Science* 2011; 52(10): 7160-7167

Pereira, C, Lung Wen, C, Tavares, H, Alcohol Abuse Management in Primary Care: An e-Learning Course. *Telemedicine and e-Health* 2015; 21(3): 200-206

Robinson, T, Hills, D, Kelly, B, The evaluation of an online orientation to rural mental health practice in Australia. *Journal of Psychiatric and Mental Health Nursing* 2011; 18: 629-636

Robson, J, Web-based learning strategies in combination with published guidelines to change practice of primary care professionals. *British Journal of General Practice* 2009; 59: 104-109

Rudolf, M, Hunt, C, George, J, Hajibagheri, K, Blair, M, HENRY: development, pilot and long-term evaluation of a programme to help practitioners work more effectively with parents of babies and pre-school children to prevent childhood obesity, *Child: Care, Health and Development* 2010; 36(6): 850-857

Russell, J, Elton, L, Swinglehurst, D, Greenhalgh, T, Using the online environment in assessment for learning: a case study of a web based course in primary care, *Assessment and Evaluation in Higher Education* 2006; 31(4): 465-478

Sandars, J and Langlois, M, E-learning and the educator in primary care: responding to the challenge, *Education for Primary Care* 2005; 16: 129-133

Tapia-Coyner, R, Gallardo-Rincon, H, Garcia-Garcia, G, Saucedo-Martinez, R, De la Torre-Campos, L, Renoirte-Lopez, K, Online CKD education program for health-care professionals, *Kidney International Supplements* 2013; 3: 174-177
