# Supplementary material for: Interprofessional online learning for primary healthcare: findings from a scoping review
Source: PubMed Central journal article supplement — BMJ Open. 2017 Aug 4;7(8):e016872. doi: 10.1136/bmjopen-2017-016872 (PMC5623444; doi:10.1136/bmjopen-2017-016872), 2017-08-04
Supplement: bmjopen-2017-016872supp002.pdf [file bmjopen-2017-016872supp002.pdf]

## Appendix 2

### Overview of e-learning approaches

| Citation                | Aim of e-learning / duration / theory                                                                                                                          | Participants                                             | E-learning methods                                                                                                          | Type of interaction               | Accreditation / Assessment                                    |
|-------------------------|----------------------------------------------------------------------------------------------------------------------------------------------------------------|----------------------------------------------------------|-----------------------------------------------------------------------------------------------------------------------------|-----------------------------------|---------------------------------------------------------------|
| Barber et al., 2010     | -To improve knowledge and utilisation of occupational asthma guidelines in primary health care<br><br>-One hour duration<br><br>-No theory identified          | -783 primary health care professionals (not specified)   | -Online self-directed learning using web-based resources                                                                    | Asynchronous                      | BMJ Accredited<br><br>Formative assessment                    |
| Bekkers et al., 2010    | -To enhance the quality of antibiotic prescribing amongst primary health care practitioners<br><br>-Duration not indicated<br><br>-Theory of planned behaviour | -244 general practitioners and nurse practitioners       | -Online self-directed learning, reflection, interactive presentations and practice-based seminars, simulated SPs, web forum | Mixed: asynchronous & synchronous | -STAR programme accreditation<br><br>-Formative assessment    |
| Buriak et al., 2015     | -To improve education on cancer survivorship<br><br>-Duration not indicated<br><br>-Theory of planned behaviour                                                | 229 physicians, 213 nurse practitioners, 1,367 nurses    | Online self-directed learning using patient based case scenarios                                                            | Asynchronous                      | -Professional body accreditation<br><br>-Formative assessment |
| Cuggia et al., 2006     | -To improve information sharing between primary health care professionals<br><br>-Duration not indicated<br><br>-No theory identified                          | General practitioners and nurses (numbers not specified) | Online self-directed learning, real-time interactions and teleconsultations                                                 | Mixed asynchronous & synchronous  | -Accreditation not mentioned<br><br>-Formative assessment     |
| Degryse et al., 2009    | -to improve knowledge about the diagnosis of dementia<br><br>-Five hour duration<br><br>-Discovery learning theory                                             | 26 general practitioners and nurses                      | - Online self-directed learning Interactive software, simulated patient cases                                               | Asynchronous                      | -Accreditation not mentioned<br><br>-Formative assessment     |
| Docherty & Sandhu, 2006 | -To improve knowledge of interprofessional diabetes care<br><br>-No duration indicated<br><br>-No theory identified                                            | 35 general practitioners and nurses                      | -Online self-directed learning, residential workshop, online learning, interactive exercises                                | Mixed asynchronous & synchronous  | -University accreditation<br><br>-Summative assessment        |
| Fox et al., 2001        | -To improve understanding of                                                                                                                                   | 111 post primary health care                             | -Online self-directed learning                                                                                              | Asynchronous                      | -Accreditation not mentioned                                  |

|                        |                                                                                                                                                                   |                                                                                           |                                                                                                          |                                  |                                                                      |
|------------------------|-------------------------------------------------------------------------------------------------------------------------------------------------------------------|-------------------------------------------------------------------------------------------|----------------------------------------------------------------------------------------------------------|----------------------------------|----------------------------------------------------------------------|
|                        | <p>change management concepts and principles for primary health care professionals</p> <p>-12 week duration</p> <p>-Theories of change management</p>             | professionals (unspecified)                                                               | exercises                                                                                                |                                  | -Formative assessment                                                |
| Gensichen et al., 2009 | <p>To improve the understanding of e-learning approaches for primary healthcare professionals</p> <p>-No duration indicated</p> <p>-No theory identified</p>      | 76 primary healthcare professionals (unspecified)                                         | Unspecified                                                                                              | Asynchronous                     | <p>-Accreditation not mentioned</p> <p>-Assessment not mentioned</p> |
| Halabisky et al., 2010 | <p>-To enhance collaborative practice among healthcare teams in long term care homes</p> <p>-8½ hour duration</p> <p>-Change management</p>                       | 59 family physicians, nurses, nurse practitioners and pharmacists                         | Online activities, audio/video clips, worksheets, face-to-face team contact)                             | Mixed asynchronous & synchronous | <p>-Accreditation not mentioned</p> <p>-Formative assessment</p>     |
| Hannon et al., 2012    | <p>-Improve the diagnosis and management of Chronic Fatigue Syndrome (CFS) in primary health care</p> <p>-Duration not indicated</p> <p>-No theory identified</p> | 44 participants (general practitioners, practice nurses CFS specialists, carers, patients | Blended learning, (podcasts, soundbites, diagnostic descriptions, patient interface, management options) | Asynchronous                     | <p>-Accreditation not mentioned</p> <p>-Assessment not mentioned</p> |
| James et al., 2011     | <p>-To educate practitioners in the safe use of insulin</p> <p>-One hour duration</p> <p>-No theory identified</p>                                                | 31,089 participants (general practitioners, nurses, pharmacists, others – not specified)  | Online self-directed learning using audio-visual resources                                               | Asynchronous                     | <p>-Accreditation not mentioned</p> <p>-Summative assessment</p>     |
| Jenkins et al., 2014   | <p>-To improve interprofessional pain management education in primary and community care settings</p> <p>-14 week duration</p> <p>-Theories of adult learning</p> | 24 general practitioners, 10 nurses, 10 pharmacists, four physiotherapists                | Online self-directed learning using critical reflections, case studies, blog postings                    | Mixed asynchronous & synchronous | <p>- University accreditation</p> <p>-Summative assessment</p>       |
| Kang et al., 2015      | <p>-To enhance the management of chronic disease for primary</p>                                                                                                  | 27 family physicians and seven nurse                                                      | Blended learning (learning objectives, clinical                                                          | Mixed asynchronous & synchronous | -Professional body accreditation                                     |

|                                  |                                                                                                                                                                        |                                                                                                            |                                                                                                                                                           |                                        |                                                                     |
|----------------------------------|------------------------------------------------------------------------------------------------------------------------------------------------------------------------|------------------------------------------------------------------------------------------------------------|-----------------------------------------------------------------------------------------------------------------------------------------------------------|----------------------------------------|---------------------------------------------------------------------|
|                                  | healthcare providers<br>-13 week duration<br>-No theory identified                                                                                                     | practitioners                                                                                              | rotations,<br>mentorship)                                                                                                                                 |                                        | -Summative<br>assessment                                            |
| Macfarlane<br>et al., 2000       | To increase<br>understanding of<br>epidemiology for<br>primary health care<br>practitioners<br><br>-Duration not indicated<br><br>-No theory identified                | Not clear                                                                                                  | Online self-<br>directed learning<br>using interactive<br>software                                                                                        | Asynchronous                           | -Accreditation<br>not mentioned<br><br>-Assessment<br>not mentioned |
| Maloney et<br>al., 2015          | To improve knowledge<br>and practice of using<br>social media<br><br>-Duration not indicated<br><br>-No theory identified                                              | 317, physicians,<br>physiotherapists ,<br>podiatrists and<br>others (not<br>specified)                     | Online self-<br>directed learning<br>using a range of<br>web-based<br>resources                                                                           | Asynchronous                           | -Accreditation<br>not mentioned<br><br>-Assessment<br>not mentioned |
| Marsh-<br>Tootle et<br>al., 2011 | To improve and sustain<br>knowledge and<br>screening for Amblyopia<br>in primary health care<br><br>-Duration not indicated<br><br>-Theories of adult<br>learning      | 136 primary<br>health care<br>providers (not<br>specified)                                                 | Online self-<br>directed learning<br>using case based<br>web-based<br>modules, videos<br>and animations                                                   | Asynchronous                           | -Accreditation<br>not mentioned<br><br>-Formative<br>assessment     |
| Pereira et<br>al., 2015          | -To improve the<br>management of alcohol<br>abuse in primary health<br>care<br><br>-9 hour duration<br><br>-No theory identified                                       | 67 primary health<br>care professionals<br>(not specified)                                                 | Online self-<br>directed learning,<br>web-conferences,<br>face-to-face<br>conferences,<br>videos, text, e-<br>chats, audio chats                          | Mixed<br>asynchronous<br>& synchronous | -University<br>accreditation<br><br>-Summative<br>assessment        |
| Robinson et<br>al., 2011         | -To improve confidence<br>and knowledge about<br>providing rural<br>healthcare<br><br>-24 week duration<br><br>-Constructivist theory                                  | 75 participants<br>including nurses,<br>occupational<br>therapists,<br>psychologists and<br>social workers | Online self-<br>directed learning,<br>interactive<br>exercises,<br>moderated<br>discussion<br>forums, chat<br>forums,<br>telephone, video<br>conferencing | Mixed<br>asynchronous<br>& synchronous | -Accreditation<br>not mentioned<br><br>-Formative<br>assessment     |
| Robson,<br>2009                  | -To combine learning<br>strategies with<br>published guidelines<br>with the intention of<br>changing practice<br><br>-Duration not indicated<br><br>-Theories of adult | 45 general<br>practitioners and<br>practice nurses                                                         | Online self-<br>directed learning<br>(web-based<br>resources)                                                                                             | Asynchronous                           | -Accreditation<br>not mentioned<br><br>-Formative<br>assessment     |

|                           |                                                                                                                                                                                            |                                                                                                                |                                                                                                      |                                  |                                                               |
|---------------------------|--------------------------------------------------------------------------------------------------------------------------------------------------------------------------------------------|----------------------------------------------------------------------------------------------------------------|------------------------------------------------------------------------------------------------------|----------------------------------|---------------------------------------------------------------|
|                           | learning                                                                                                                                                                                   |                                                                                                                |                                                                                                      |                                  |                                                               |
| Rudolf et al., 2010       | To develop practitioners to work effectively with parents of babies and pre-school children in the prevention of childhood obesity<br><br>-2 day duration<br><br>-Family partnership model | 137 primary practitioners (health visitors, nurses, outreach workers, centre managers, family support workers) | Online learning, using web-based activities, face-to-face interactions, website and resource toolkit | Asynchronous                     | -Accreditation not mentioned<br><br>-Formative assessment     |
| Russell et al., 2006      | -To improve knowledge of primary health care practice<br><br>-1-2 year duration (part-time MSc)<br><br>-Constructionist theory                                                             | Primary healthcare practitioners (not specified)                                                               | Online self-directed learning and e-based interactive learning                                       | Mixed asynchronous & synchronous | -University accreditation<br><br>-Summative assessment        |
| Sandars & Langlois, 2005  | -To understand the role of e-learning approaches in primary health care<br><br>-Duration not indicated<br><br>-No theory identified                                                        | Not mentioned                                                                                                  | -Self-directed learning, online materials, resources                                                 | Mixed asynchronous & synchronous | -Accreditation not mentioned<br><br>-Assessment not mentioned |
| Tapia-Coyner et al., 2013 | -To improve knowledge of chronic kidney disease<br><br>-Duration not indicated<br><br>-No theory identified                                                                                | -844 participants from medicine, nursing, nutrition, social work                                               | -Online self-directed learning, virtual tutors, face-to-face interaction with health experts         | Mixed asynchronous & synchronous | -Professional body accreditation<br><br>-Summative assessment |
