# Supplementary material for: Interprofessional online learning for primary healthcare: findings from a scoping review
Source: PubMed Central journal article supplement — BMJ Open. 2017 Aug 4;7(8):e016872. doi: 10.1136/bmjopen-2017-016872 (PMC5623444; doi:10.1136/bmjopen-2017-016872), 2017-08-04
Supplement: bmjopen-2017-016872supp003.pdf [file bmjopen-2017-016872supp003.pdf]

## Appendix 3

### Overview of methodological information

| Citation                  | Study Design                | Data collected                                 | Sample size  |
|---------------------------|-----------------------------|------------------------------------------------|--------------|
| Barber et al., 2010       | Pre/post intervention study | Surveys (not validated)                        | n=258        |
| Bekkers et al., 2010      | Case study                  | Individual interviews                          | n=31         |
| Buriak et al., 2015       | Post-intervention study     | Survey (validated)                             | n=1,809      |
| Cuggia et al., 2006       | Longitudinal study          | Surveys (not validated)                        | Not reported |
| Degryse et al., 2009      | Post-intervention study     | Survey (not-validated)                         | n=30         |
| Docherty & Sandhu, 2006   | Case study                  | Individual interviews                          | n=35         |
| Fox et al., 2001          | Pre/post intervention study | Surveys (not validated)                        | n=68         |
| Gensichen et al., 2009    | Delphi study                | Surveys (not validated)                        | n=76         |
| Halabisky et al., 2010    | Mixed methods study         | Surveys (validated), focus groups, interviews  | n=51         |
| Hannon et al., 2012       | Case study                  | Interviews                                     | n=44         |
| James et al., 2011        | Longitudinal study          | Surveys (not validated)                        | n=16,540     |
| Jenkins et al., 2014      | Case study                  | Course documents                               | n=48         |
| Kang et al., 2015         | Post-intervention study     | Surveys (not validated)                        | n=24         |
| Macfarlane et al., 2000   | Post-intervention study     | Survey (not validated)                         | Not reported |
| Maloney et al., 2015      | Mixed methods study         | Surveys (not validated), individual interviews | n=173        |
| Marsh-Tootle et al., 2011 | Randomised controlled trial | Surveys (not validated)                        | n=65         |
| Pereira et al., 2015      | Pre/post intervention study | Surveys (not validated)                        | n=33         |
| Robinson et al., 2011     | Mixed methods               | Survey (validated), Interviews                 | n=28         |
| Robson, 2009              | Mixed methods study         | Surveys (not validated), individual interviews | n=45         |
| Rudolf et al., 2010       | Mixed methods study         | Surveys (not validated), interviews            | n=137        |

|                           |                         |                        |           |
|---------------------------|-------------------------|------------------------|-----------|
| Russell et al., 2006      | Case study              | Unspecified            | Not clear |
| Sandars & Langlois, 2005  | Post-intervention study | Survey (non-validated) | Not clear |
| Tapia-Coyner et al., 2013 | Post-intervention study | Course documents       | n=362     |
